## PEARLS

# *Salmonella* finds a way: Metabolic versatility of *Salmonella enterica* serovar Typhimurium in diverse host environments

Savannah J. Taylor<sup>1</sup>\*, Sebastian E. Winter<sup>1</sup>\*

Department of Microbiology, University of Texas Southwestern Medical Center, Dallas, Texas, United States of America

\* [Sebastian.Winter@UTSouthwestern.edu](mailto:Sebastian.Winter@UTSouthwestern.edu) (SEW); [Savannah.Taylor@UTSouthwestern.edu](mailto:Savannah.Taylor@UTSouthwestern.edu) (SJT)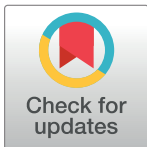**OPEN ACCESS**

**Citation:** Taylor SJ, Winter SE (2020) *Salmonella* finds a way: Metabolic versatility of *Salmonella enterica* serovar Typhimurium in diverse host environments. PLoS Pathog 16(6): e1008540. <https://doi.org/10.1371/journal.ppat.1008540>

**Editor:** John M. Leong, Tufts Univ School of Medicine, UNITED STATES

**Published:** June 11, 2020

**Copyright:** © 2020 Taylor, Winter. This is an open access article distributed under the terms of the [Creative Commons Attribution License](https://creativecommons.org/licenses/by/4.0/), which permits unrestricted use, distribution, and reproduction in any medium, provided the original author and source are credited.

**Funding:** Work in SEW's lab was funded by the NIH (AI118807), The Welch Foundation (I-1969-20180324), the Burroughs Wellcome Fund (1017880), and a Research Scholar Grant (RSG-17-048-01-MPC) from the American Cancer Society. ST is supported by an NIH Institutional Training Grant (AI007520). Any opinions, findings, and conclusions or recommendations expressed in this material are those of the author(s) and do not necessarily reflect the views of the funding agencies. The funders had no role in study design, data collection and interpretation, or the decision to submit the work for publication.

**Competing interests:** I have read the journal's policy and have the following conflicts: SEW is

## Introduction

Infection with nontyphoidal *Salmonella* strains, such as *Salmonella enterica* serovar Typhimurium (*S. Typhimurium*) commonly causes foodborne bacterial gastroenteritis. Studies on the pathogenesis of *S. Typhimurium* infection often focus on bona fide virulence factors. *S. Typhimurium* produces two distinct type III secretion systems that allow for the delivery of a sophisticated repertoire of effector proteins into host cells. These type III secretion systems are required for invasion of intestinal epithelial cells and subsequent replication inside professional phagocytes in the lamina propria and in deeper tissues. In immunocompetent individuals, detection of *S. Typhimurium* by the innate immune system results in a subacute, neutrophilic inflammatory response that confines the infection to the intestinal tract. In immunocompromised individuals, such as those with neutropenia, systemic dissemination and replication can occur. While we understand key strategies of how *S. Typhimurium* causes disease, we are only beginning to recognize the complex interplay of host and bacterial metabolism. Recent findings have revealed how *S. Typhimurium* adapts its diverse energy metabolism to mirror host metabolism and limit nutrient competition in various host niches.

## Intracellular *Salmonella* adapts its metabolism to M1- and M2-polarized macrophages

In contrast to the self-limiting gastroenteritis observed in humans, *S. Typhimurium* establishes a systemic chronic infection in most mouse strains. *S. Typhimurium* survives and replicates in macrophages for weeks after infection, and the host immune system forms granulomas to contain pathogen spread. Most *S. Typhimurium*-infected macrophages belong to the M2 subtype [1,2] (Fig 1). M2 macrophages, commonly referred to as “anti-inflammatory” macrophages, promote wound healing and inhibit inflammation by producing IL-10 (interleukin 10) and TGF- $\beta$  (transforming growth factor  $\beta$ ) (reviewed in [3]). *S. Typhimurium* can also be found in other M2-like macrophage subtypes, such as granuloma macrophages, which share many characteristics with M2 macrophages but have distinct cell markers and functions [4]. Additionally, *S. Typhimurium* infects hemophagocytic macrophages, macrophages that have ingested nonapoptotic cells [5, 6]. Hemophagocytic macrophages express M2 markers and produce lower levels of inducible nitric oxide synthase (iNOS) [7].

*S. Typhimurium* induces polarization of infected macrophages [8] (Fig 1). Delivery of the bacterial effector SteE promotes a phenotypic switch to M2 polarization by driving noncanonical activation of STAT3 (Signal Transducer And Activator Of Transcription 3) signaling [8, 9]. SteE also induces a M2-like phenotype in infected granuloma macrophages [4]. This process is

listed as an inventor on patent application WO2014200929A1, which describes a treatment to prevent the inflammation-associated expansion of Enterobacteriaceae. The other author SJT has declared that no competing interests exist.

inhibited by TNF $\alpha$  (tumor necrosis factor  $\alpha$ ), which drives macrophage polarization toward an antimicrobial phenotype with higher iNOS activity [4]. In a process dependent on Toll-like receptor 4 (TLR4) signaling [6], *S. Typhimurium* also drives macrophages to increase hemophagocytosis or consumption of erythrocytes (red blood cells) and leukocytes (white blood cells) [5], creating a population of hemophagocytic macrophages with M2-like properties.

M2-type macrophages produce less antibacterial effector molecules, such as nitric oxide (NO) and reactive oxygen species, making them more permissive for *S. Typhimurium* replication. However, macrophage differentiation not only changes the cell's role in the immune response, it also changes the cell's metabolic program [3]. In persistently infected M2 macrophages, the transcription factor PPAR $\delta$  (peroxisome proliferator-activated receptor  $\delta$ ) is activated [2]. PPAR $\delta$  drives a lipid oxidation metabolism in the M2 macrophages, which results in more glucose available in the cell [2]. *S. Typhimurium* in infected M2 macrophages uses this glucose and other simple sugars to replicate [2, 10], presumably in a fermentative type of metabolism (Fig 1). In each of these M2-like macrophages, intracellular *S. Typhimurium* engineers a more permissive environment within its host macrophages with less exposure to antimicrobials. At the same time, *S. Typhimurium* responds to the metabolic reprogramming that accompanies polarization by relying on a glycolytic metabolism, while the macrophage uses mostly  $\beta$ -oxidation [2, 10, 11].

Despite their antibacterial function, M1 macrophages can also provide a site for *S. Typhimurium* replication [12] (Fig 1). M1 macrophages, also known as “pro-inflammatory” macrophages, produce large quantities of antimicrobials, such as reactive nitrogen species [3]. In contrast to M2 macrophages, M1 macrophages mainly carry out an anaerobic glycolytic metabolism [3]. Instead of competing with the host for nutrients, *S. Typhimurium* responds to

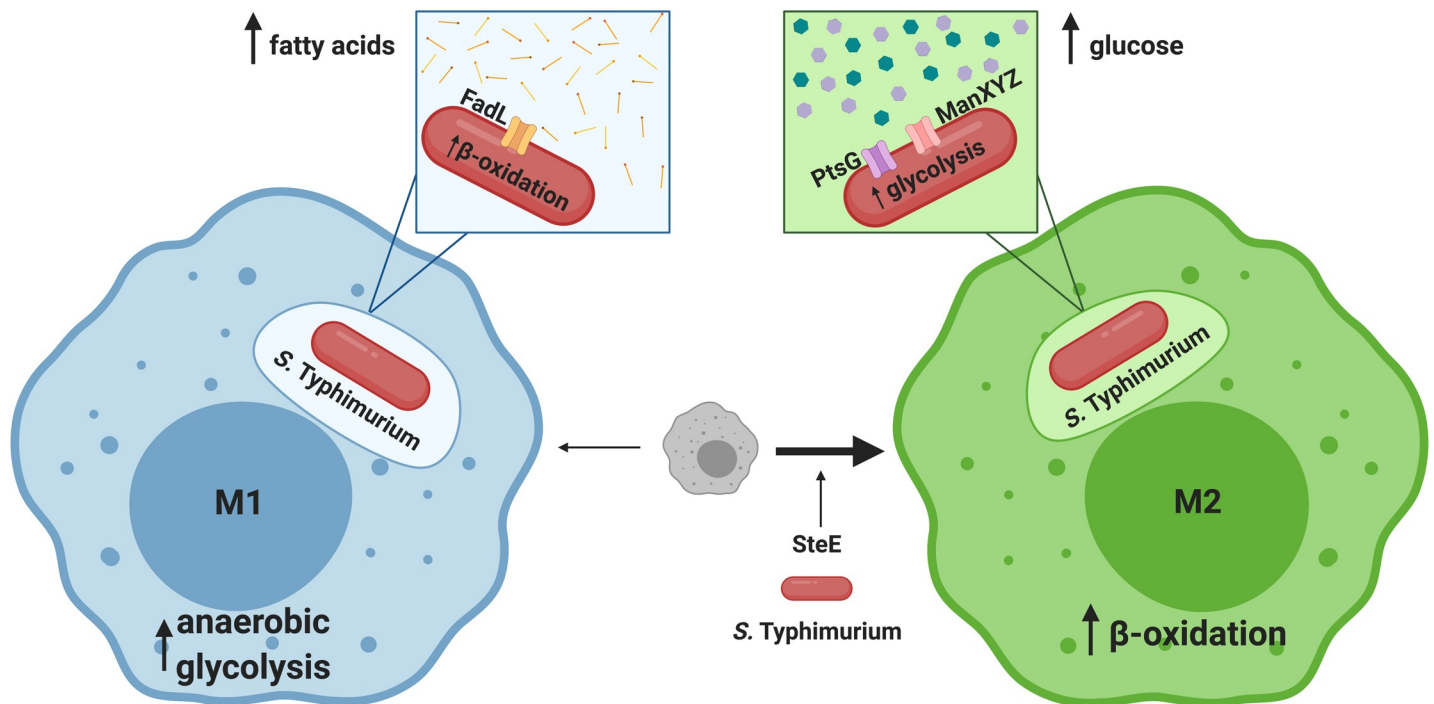

**Fig 1. Intracellular *Salmonella* adapts its metabolism to M1- and M2-polarized macrophages.** M1-type macrophages perform anaerobic glycolysis to avoid diverting oxygen from NADPH oxidase activity. *Salmonella* takes up fatty acids from the *Salmonella*-containing vacuole through the FadL transporter and degrades them through  $\beta$ -oxidation. The type III secretion system effector SteE drives M2 polarization. M2-type macrophages perform an oxidative metabolism. Inside M2-type macrophages, *Salmonella* utilizes sugars. Uptake of sugars is mediated by phosphotransferase systems (PtsG, ManXYZ) and possibly other transport systems.

<https://doi.org/10.1371/journal.ppat.1008540.g001>

the host's glycolytic metabolic program by oxidizing lipids [12]. Lipid transport,  $\beta$ -oxidation, and glyoxylate shunt genes are required for *S. Typhimurium* to effectively replicate in M1 macrophages and spread to systemic sites [12]. Though *S. Typhimurium* counteracts many of the host's defenses, exposure to NO in infected M1 macrophages still alters *S. Typhimurium* metabolism. The tricarboxylic acid cycle (TCA) cycle relies on iron-sulfur cluster-containing enzymes, which are very sensitive to damage by NO [13]. Diminished activity of these enzymes results in a transient methionine and lysine auxotrophy due to decreased production of succinyl-CoA, a metabolic intermediate in both the TCA cycle and amino acid biosynthesis [13]. Even within antimicrobial M1 macrophages, *S. Typhimurium* survives using its metabolic versatility to mirror the host's metabolic program.

### **S. Typhimurium utilizes inflammation-derived electron acceptors and exploits host energy metabolism**

The gut microbiota protects the intestinal lumen from invasion by enteric pathogens, a phenomenon termed colonization resistance. To overcome colonization resistance, *S. Typhimurium* induces mucosal inflammation. Inflammation changes nutrient availability in the large intestine, thus allowing *S. Typhimurium* to outgrow the resident commensal microbiota and enhancing host transmission by the fecal-oral route [14, 15]. *Salmonella* populations in the intestinal lumen are heterogeneous [16]; a subpopulation invades the host mucosa and incites inflammation, while a second population replicates in the lumen away from the frontlines of the immune system.

The intestinal epithelium constantly interacts with gut bacteria, both in homeostasis and during enteric infection. These interactions include reciprocal metabolic pathways, where the epithelium consumes metabolites produced by the microbes and vice versa (Fig 2). During homeostasis, the microbiota consists mostly of obligate anaerobic bacteria from the orders Clostridiales and Bacteroidales. Members of Clostridiales, particularly *Clostridium* groups IV and XIVa, produce the short chain fatty acid butyrate [17] (Fig 2). Butyrate is the preferred carbon source for colon epithelium, used as a substrate for  $\beta$ -oxidation [18].  $\beta$ -oxidation consumes most of the oxygen coming from the blood stream, maintaining physiological hypoxia in the gut lumen, which is ideal for the obligate anaerobic microbiota [19, 20]. *Salmonella*-induced inflammation depletes the butyrate-producing members of the microbiota [21] (Fig 2). In the absence of butyrate, the host epithelium switches its metabolism to anaerobic lactate fermentation [18]. Since lactate fermentation does not consume oxygen, oxygen from the blood stream diffuses into the gut lumen [19, 21]. *S. Typhimurium*, a facultative anaerobic bacterium, uses oxygen in the inflamed gut to outgrow the commensal microbiota through respiration [21]. In addition to more oxygen, the epithelial switch to lactate fermentation releases more lactate into gut lumen [22]. *S. Typhimurium* uses this lactate as a carbon source with its L-lactate dehydrogenase enzyme encoded by the gene *lldD* [22]. *S. Typhimurium* lactate utilization is coupled with oxygen respiration [22]. In the example of lactate, *S. Typhimurium* exploits lactate and oxygen, the products of an epithelial switch from respiration to fermentation, to feed its own respiratory metabolism and consequently outgrow the commensal anaerobic microbiota.

Early during infection, *Salmonella* requires fumarate reductase activity, suggesting that *S. Typhimurium* relies on a branched TCA cycle, in which the reductive branch assists with maintaining redox homeostasis [23]. At later time points, *S. Typhimurium* capitalizes on products of the innate immune response during infection. The inflammatory response induced by *Salmonella* involves transmigration of neutrophils into the gut lumen, where these immune cells release reactive oxygen species and reactive nitrogen species (Fig 2). These species indiscriminately react with host tissues, the resident microbiota, and metabolites available in the gut lumen. These metabolites include thiosulfate ( $S_2O_3^{2-}$ ), which is produced by the host

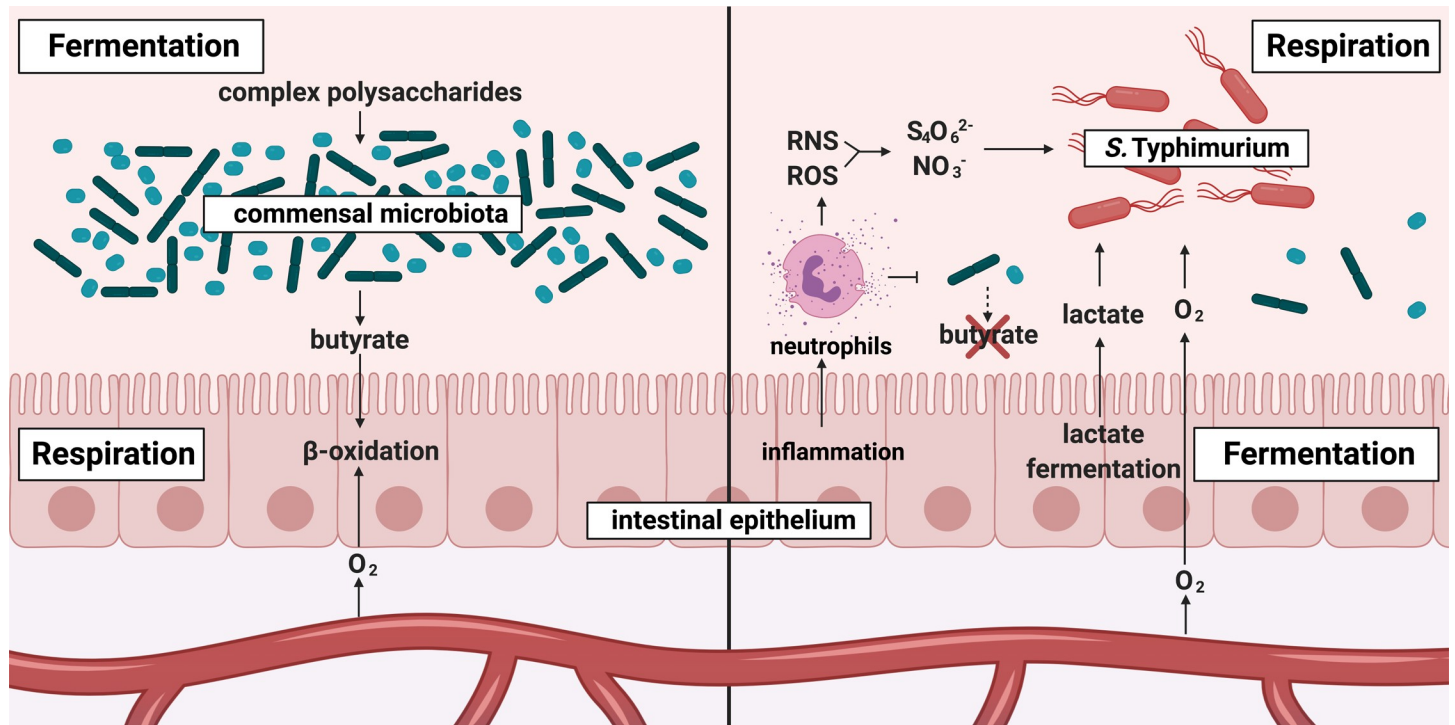

**Fig 2. *S. Typhimurium* utilizes inflammation-derived electron acceptors and exploits host energy metabolism.** During homeostasis (left panel), microbial fermentation of fiber results in the accumulation of short chain fatty acids, such as butyrate. Butyrate instructs intestinal epithelial cells to perform  $\beta$ -oxidation. This oxidative host metabolism depletes oxygen at the epithelial interface. During *Salmonella* infection (right panel), transmigrating neutrophils introduce RNS and ROS, which give rise to tetrathionate ( $S_4O_6^{2-}$ ) and nitrate ( $NO_3^-$ ) in the lumen. Furthermore, inflammation depletes butyrate-producing bacteria, and the intestinal epithelium shifts to lactate fermentation. Lack of local oxygen consumption results in oxygen diffusing into the otherwise anaerobic gut lumen. Oxygen, tetrathionate, and nitrate are used by *Salmonella* as terminal electron acceptors to support an oxidative central metabolism. An oxidative metabolism allows for the efficient degradation of poorly fermentable carbon compounds, such as host-derived lactate. ROS, reactive oxygen species; RNS, reactive nitrogen.

<https://doi.org/10.1371/journal.ppat.1008540.g002>

epithelium to defuse the toxic microbiota byproduct hydrogen sulfide ( $H_2S$ ) [24, 25]. During an oxidative burst, thiosulfate reacts with reactive oxygen species to produce tetrathionate ( $S_4O_6^{2-}$ ) [26]. Furthermore, reactive nitrogen species decay into nitrate. Both tetrathionate and nitrate can be used by *S. Typhimurium* as an electron acceptor for anaerobic respiration [26, 27]. Respiration supports a full, oxidative TCA cycle [28] and the utilization of poorly fermentable carbon sources, such as succinate, lactate, 1,2 propanediol, and ethanolamine [22, 28–30]. In this example, *S. Typhimurium* uses its diverse respiratory metabolism to utilize inflammation-derived electron acceptors and to outcompete obligate anaerobic commensals.

## Conclusions

During infection, *S. Typhimurium* faces obstacles ranging from the gut microbiota to the immune system. Many aspects of *Salmonella* metabolism in the context of infection remain to be elucidated. However, the current literature reveals a pattern of reciprocal metabolism between *S. Typhimurium* and the host. *S. Typhimurium* uses its diverse metabolism to exploit local nutrient niches, outgrow resident microbiota, and persist within professional phagocytes.

## References

1. Nix RN, Altschuler SE, Henson PM, Detweiler CS. Hemophagocytic macrophages harbor *Salmonella* enterica during persistent infection. *PLoS Pathog.* 2007; 3(12):e193. Epub 2007/12/19. <https://doi.org/10.1371/journal.ppat.0030193> PMID: 18085823; PubMed Central PMCID: PMC2134957.

2. Eisele NA, Ruby T, Jacobson A, Manzanillo PS, Cox JS, Lam L, et al. Salmonella require the fatty acid regulator PPARdelta for the establishment of a metabolic environment essential for long-term persistence. *Cell Host Microbe*. 2013; 14(2):171–82. Epub 2013/08/21. <https://doi.org/10.1016/j.chom.2013.07.010> PMID: 23954156; PubMed Central PMCID: PMC3785333.
3. Shapouri-Moghaddam A, Mohammadian S, Vazini H, Taghadosi M, Esmaeili SA, Mardani F, et al. Macrophage plasticity, polarization, and function in health and disease. *J Cell Physiol*. 2018; 233(9):6425–40. Epub 2018/01/11. <https://doi.org/10.1002/jcp.26429> PMID: 29319160.
4. Pham THM, Brewer SM, Thurston T, Massis LM, Honeycutt J, Lugo K, et al. Salmonella-Driven Polarization of Granuloma Macrophages Antagonizes TNF-Mediated Pathogen Restriction during Persistent Infection. *Cell Host Microbe*. 2020; 27(1):54–67 e5. Epub 2019/12/31. <https://doi.org/10.1016/j.chom.2019.11.011> PMID: 31883922.
5. Pilonieta MC, Moreland SM, English CN, Detweiler CS. Salmonella enterica infection stimulates macrophages to hemophagocytose. *mBio*. 2014; 5(6):e02211. Epub 2014/12/11. <https://doi.org/10.1128/mBio.02211-14> PMID: 25491357; PubMed Central PMCID: PMC4324247.
6. McDonald EM, Pilonieta MC, Nick HJ, Detweiler CS. Bacterial Stimulation of Toll-Like Receptor 4 Drives Macrophages To Hemophagocytose. *Infect Immun*. 2016; 84(1):47–55. Epub 2015/10/16. <https://doi.org/10.1128/IAI.01149-15> PMID: 26459510; PubMed Central PMCID: PMC4693988.
7. McCoy MW, Moreland SM, Detweiler CS. Hemophagocytic macrophages in murine typhoid fever have an anti-inflammatory phenotype. *Infect Immun*. 2012; 80(10):3642–9. Epub 2012/08/08. <https://doi.org/10.1128/IAI.00656-12> PMID: 22868497; PubMed Central PMCID: PMC3457584.
8. Stapels DAC, Hill PWS, Westermann AJ, Fisher RA, Thurston TL, Saliba AE, et al. Salmonella persisters undermine host immune defenses during antibiotic treatment. *Science*. 2018; 362(6419):1156–60. Epub 2018/12/14. <https://doi.org/10.1126/science.aat7148> PMID: 30523110.
9. Panagi I, Jennings E, Zeng J, Gunster RA, Stones CD, Mak H, et al. Salmonella Effector SteE Converts the Mammalian Serine/Threonine Kinase GSK3 into a Tyrosine Kinase to Direct Macrophage Polarization. *Cell Host Microbe*. 2020; 27(1):41–53 e6. Epub 2019/12/22. <https://doi.org/10.1016/j.chom.2019.11.002> PMID: 31862381; PubMed Central PMCID: PMC6953433.
10. Bowden SD, Rowley G, Hinton JC, Thompson A. Glucose and glycolysis are required for the successful infection of macrophages and mice by Salmonella enterica serovar typhimurium. *Infect Immun*. 2009; 77(7):3117–26. Epub 2009/04/22. <https://doi.org/10.1128/IAI.00093-09> PMID: 19380470; PubMed Central PMCID: PMC2708584.
11. Rodriguez-Prados JC, Traves PG, Cuenca J, Rico D, Aragonés J, Martín-Sanz P, et al. Substrate fate in activated macrophages: a comparison between innate, classic, and alternative activation. *J Immunol*. 2010; 185(1):605–14. Epub 2010/05/26. <https://doi.org/10.4049/jimmunol.0901698> PMID: 20498354.
12. Reens AL, Nagy TA, Detweiler CS. Salmonella enterica Requires Lipid Metabolism Genes To Replicate in Proinflammatory Macrophages and Mice. *Infect Immun*. 2019; 88(1). Epub 2019/10/16. <https://doi.org/10.1128/IAI.00776-19> PMID: 31611277; PubMed Central PMCID: PMC6921662.
13. Richardson AR, Payne EC, Younger N, Karlinsey JE, Thomas VC, Becker LA, et al. Multiple targets of nitric oxide in the tricarboxylic acid cycle of Salmonella enterica serovar typhimurium. *Cell Host Microbe*. 2011; 10(1):33–43. Epub 2011/07/20. <https://doi.org/10.1016/j.chom.2011.06.004> PMID: 21767810; PubMed Central PMCID: PMC3142370.
14. Stecher B, Robbani R, Walker AW, Westendorf AM, Barthel M, Kremer M, et al. Salmonella enterica serovar typhimurium exploits inflammation to compete with the intestinal microbiota. *PLoS Biol*. 2007; 5(10):2177–89. Epub 2007/09/01. <https://doi.org/10.1371/journal.pbio.0050244> PMID: 17760501; PubMed Central PMCID: PMC1951780.
15. Lawley TD, Bouley DM, Hoy YE, Gerke C, Relman DA, Monack DM. Host transmission of Salmonella enterica serovar Typhimurium is controlled by virulence factors and indigenous intestinal microbiota. *Infect Immun*. 2008; 76(1):403–16. Epub 2007/10/31. <https://doi.org/10.1128/IAI.01189-07> PMID: 17967858; PubMed Central PMCID: PMC2223630.
16. Ackermann M, Stecher B, Freed NE, Songhet P, Hardt WD, Doebeli M. Self-destructive cooperation mediated by phenotypic noise. *Nature*. 2008; 454(7207):987–90. Epub 2008/08/23. <https://doi.org/10.1038/nature07067> PMID: 18719588.
17. Vital M, Howe AC, Tiedje JM. Revealing the bacterial butyrate synthesis pathways by analyzing (meta) genomic data. *mBio*. 2014; 5(2):e00889. Epub 2014/04/24. <https://doi.org/10.1128/mBio.00889-14> PMID: 24757212; PubMed Central PMCID: PMC3994512.
18. Donohoe DR, Garge N, Zhang X, Sun W, O'Connell TM, Bunker MK, et al. The microbiome and butyrate regulate energy metabolism and autophagy in the mammalian colon. *Cell Metab*. 2011; 13(5):517–26. Epub 2011/05/03. <https://doi.org/10.1016/j.cmet.2011.02.018> PMID: 21531334; PubMed Central PMCID: PMC3099420.

19. Kelly CJ, Zheng L, Campbell EL, Saeedi B, Scholz CC, Bayless AJ, et al. Crosstalk between Microbiota-Derived Short-Chain Fatty Acids and Intestinal Epithelial HIF Augments Tissue Barrier Function. *Cell Host Microbe*. 2015; 17(5):662–71. Epub 2015/04/14. <https://doi.org/10.1016/j.chom.2015.03.005> PMID: 25865369; PubMed Central PMCID: PMC4433427.
20. Byndloss MX, Olsan EE, Rivera-Chavez F, Tiffany CR, Cevallos SA, Lokken KL, et al. Microbiota-activated PPAR-gamma signaling inhibits dysbiotic Enterobacteriaceae expansion. *Science*. 2017; 357(6351):570–5. Epub 2017/08/12. <https://doi.org/10.1126/science.aam9949> PMID: 28798125; PubMed Central PMCID: PMC5642957.
21. Rivera-Chavez F, Zhang LF, Faber F, Lopez CA, Byndloss MX, Olsan EE, et al. Depletion of Butyrate-Producing Clostridia from the Gut Microbiota Drives an Aerobic Luminal Expansion of Salmonella. *Cell Host Microbe*. 2016; 19(4):443–54. Epub 2016/04/15. <https://doi.org/10.1016/j.chom.2016.03.004> PMID: 27078066; PubMed Central PMCID: PMC4832419.
22. Gillis CC, Hughes ER, Spiga L, Winter MG, Zhu W, Furtado de Carvalho T, et al. Dysbiosis-Associated Change in Host Metabolism Generates Lactate to Support Salmonella Growth. *Cell Host Microbe*. 2018; 23(1):54–64 e6. Epub 2017/12/26. <https://doi.org/10.1016/j.chom.2017.11.006> PMID: 29276172; PubMed Central PMCID: PMC5764812.
23. Maier L, Vyas R, Cordova CD, Lindsay H, Schmidt TS, Brugiroux S, et al. Microbiota-derived hydrogen fuels Salmonella typhimurium invasion of the gut ecosystem. *Cell Host Microbe*. 2013; 14(6):641–51. Epub 2013/12/18. <https://doi.org/10.1016/j.chom.2013.11.002> PMID: 24331462.
24. Levitt MD, Furne J, Springfield J, Suarez F, DeMaster E. Detoxification of hydrogen sulfide and methanethiol in the cecal mucosa. *J Clin Invest*. 1999; 104(8):1107–14. Epub 1999/10/19. <https://doi.org/10.1172/JCI7712> PMID: 10525049; PubMed Central PMCID: PMC408582.
25. Furne J, Springfield J, Koenig T, DeMaster E, Levitt MD. Oxidation of hydrogen sulfide and methanethiol to thiosulfate by rat tissues: a specialized function of the colonic mucosa. *Biochem Pharmacol*. 2001; 62(2):255–9. Epub 2001/06/08. [https://doi.org/10.1016/s0006-2952\(01\)00657-8](https://doi.org/10.1016/s0006-2952(01)00657-8) PMID: 11389886.
26. Winter SE, Thiennimitr P, Winter MG, Butler BP, Huseby DL, Crawford RW, et al. Gut inflammation provides a respiratory electron acceptor for Salmonella. *Nature*. 2010; 467(7314):426–9. Epub 2010/09/25. <https://doi.org/10.1038/nature09415> PMID: 20864996; PubMed Central PMCID: PMC2946174.
27. Lopez CA, Winter SE, Rivera-Chavez F, Xavier MN, Poon V, Nuccio SP, et al. Phage-mediated acquisition of a type III secreted effector protein boosts growth of salmonella by nitrate respiration. *mBio*. 2012; 3(3). Epub 2012/06/14. <https://doi.org/10.1128/mBio.00143-12> PMID: 22691391; PubMed Central PMCID: PMC3374392.
28. Spiga L, Winter MG, Furtado de Carvalho T, Zhu W, Hughes ER, Gillis CC, et al. An Oxidative Central Metabolism Enables Salmonella to Utilize Microbiota-Derived Succinate. *Cell Host Microbe*. 2017; 22(3):291–301 e6. Epub 2017/08/29. <https://doi.org/10.1016/j.chom.2017.07.018> PMID: 28844888; PubMed Central PMCID: PMC5599368.
29. Faber F, Thiennimitr P, Spiga L, Byndloss MX, Litvak Y, Lawhon S, et al. Respiration of Microbiota-Derived 1,2-propanediol Drives Salmonella Expansion during Colitis. *PLoS Pathog*. 2017; 13(1): e1006129. Epub 2017/01/06. <https://doi.org/10.1371/journal.ppat.1006129> PMID: 28056091; PubMed Central PMCID: PMC5215881.
30. Thiennimitr P, Winter SE, Winter MG, Xavier MN, Tolstikov V, Huseby DL, et al. Intestinal inflammation allows Salmonella to use ethanolamine to compete with the microbiota. *Proc Natl Acad Sci U S A*. 2011; 108(42):17480–5. Epub 2011/10/05. <https://doi.org/10.1073/pnas.1107857108> PMID: 21969563; PubMed Central PMCID: PMC3198331.
